# Supplementary material for: The gating mechanism in cyclic nucleotide-gated ion channels
Source: PubMed Central journal article supplement (PMC5758780; doi:10.1038/s41598-017-18499-0), 2018-01-08
Supplement: 41598_2017_18499_MOESM1_ESM.pdf [file 41598_2017_18499_MOESM1_ESM.pdf]

## Supplementary Information

### The gating mechanism in cyclic nucleotide-gated ion channels

Monica Mazzolini<sup>1,#,\*</sup> Manuel Arcangeletti<sup>1,#</sup>, Arin Marchesi<sup>2,#</sup>, Luisa MR Napolitano<sup>1,3</sup>, Debora Grosa<sup>1</sup>, Sourav Maity<sup>1</sup>, Claudio Anselmi<sup>4</sup> and Vincent Torre<sup>1,\*</sup>

<sup>1</sup> International School for Advanced Studies, Trieste 34136, Italy;

<sup>2</sup> INSERM U1006, Aix-Marseille Université, Parc Scientifique et Technologique de Luminy, Marseille 13009, France.

<sup>3</sup> Structural Biology Laboratory, Elettra-Sincrotrone Trieste S.C.p.A., Basovizza, Trieste 34149, Italy;

<sup>4</sup> National Heart, Lung and Blood Institute, National Institutes of Health, Bethesda, Maryland 20892, USA

# Co-first author

\* Corresponding authors

Lead Contact: Vincent Torre; e-mail: [torre@sissa.it](mailto:torre@sissa.it),

Additional Corresponding Author: Monica Mazzolini; [mazzolin@sissa.it](mailto:mazzolin@sissa.it).

Supplementary Table 1

|                     | R297                                    | F317            | A322      | I323 | W330               |  | Y347 | V348 | L351 | L356 |  |
|---------------------|-----------------------------------------|-----------------|-----------|------|--------------------|--|------|------|------|------|--|
| CNGA1_B.Taurus      | TRTNYPNIFRISNLVMIYIIIIHWNACVYFSISKAI    | IGFGNDTWVYDPVND | PD        | ---- | FGRLARKYVYSLYWSTL  |  | 356  |      |      |      |  |
| CNGA1_Mouse         | TRTNYPNIFRISNLVMIYVIIIIHWNACVYYSISKAI   | IGFGNDTWVYDPVND | PE        | ---- | FGRLARKYVYSLYWSTL  |  | 349  |      |      |      |  |
| CNGA1_Rat           | TRTNYPNIFRISNLVMIYVIIIIHWNACVYYSISKAI   | IGFGNDTWVYDPVND | PE        | ---- | FGRLARKYVYSLYWSTL  |  | 350  |      |      |      |  |
| CNGA1_Human         | TRTNYPNIFRISNLVMIYVIIIIHWNACVYFSISKAI   | IGFGNDTWVYDPVND | PE        | ---- | FGRLARKYVYSLYWSTL  |  | 427  |      |      |      |  |
| CNGA_X.Laevis       | TRTNYPNIFRISNLIMYVIIIIHWNACVYYSISKAI    | IGFGEDTWVYPN    | TDP       | ---- | YGRILARKYVYSLYWSTL |  | 361  |      |      |      |  |
| TAX-4_C.Elegans     | TRSSMPNAPFRVWVWVYVIIIIHWNACLVFWISEW     | IGLGTDAWVYGH    | LNKQSLPDD | ITD  | TLRRYVYSFYWSTL     |  | 372  |      |      |      |  |
| CNGA_D.Melanogaster | TATGYPNAPFRICKVVLAILLVLIHWNACMYFAISYE   | IGFSSDSWVYN     | LNGTR     | ---- | NNTLQRQYIYSFYWSTL  |  | 308  |      |      |      |  |
| CNGB_D.Melanogaster | TATGYPNAPFRICKVVLAILLVLIHWNACMYFAISYE   | IGFSSDSWVYN     | LNGTR     | ---- | NNTLQRQYIYSFYWSTL  |  | 483  |      |      |      |  |
| CNGA4_Human         | TRTAYPNAPFRIAKLMLYIFVVIHWNACLVFALSRY    | IGFGRDAWVYDP    | PAQPG     | ---- | FERLRRQYIYSFYWSTL  |  | 227  |      |      |      |  |
| CNGA4_Rat           | TRTAYPNAPFRIAKLMLYIFVVIHWNACLVFALSRY    | IGFGRDAWVYDP    | PAQPG     | ---- | FERLRRQYIYSFYWSTL  |  | 227  |      |      |      |  |
| CNGA3_Rat           | TRTNYPNVFRIGNLVLYTLIIIIHWNACIYFAISKFI   | IGFGTDSWVYPN    | TSKPE     | ---- | YGRLSRKYIYSFYWSTL  |  | 282  |      |      |      |  |
| CNGA3_Mouse         | TRTNYPNVFRIGNLVLYTLIIIIHWNACIYFAISKFI   | IGFGTDSWVYPN    | TSKPE     | ---- | YARLSRKYIYSFYWSTL  |  | 340  |      |      |      |  |
| CNGA3_B.Taurus      | TRTNYPNMFRIGNLVLYTLIIIIHWNACIYFAISKFI   | IGFGTDSWVYPN    | VSNEP     | ---- | YGRLSRKYIYSFYWSTL  |  | 380  |      |      |      |  |
| CNGA3_Human         | TRTNYPNMFRIGNLVLYTLIIIIHWNACIYFAISKFI   | IGFGTDSWVYPN    | ISIDE     | ---- | HGRLSRKYIYSFYWSTL  |  | 361  |      |      |      |  |
| CNGB1_D.Rerio       | TRTSYPNLFRI CNLVLYILVIIIIHWNACIYFAISKFI | IGFGSDQWVYPN    | ISDPK     | ---- | FGTLTRGVYIYCLYWSTL |  | 337  |      |      |      |  |
| CNGA2_Mouse         | TRTSYPNIFRISNLVLYILVIIIIHWNACIYFAISKFI  | IGFGVDTWVYPN    | ITDPE     | ---- | YGYLAREYIYCLYWSTL  |  | 335  |      |      |      |  |
| CNGB1_Rat           | TRTSYPNIFRISNLVLYILVIIIIHWNACIYFAISKFI  | IGFGVDTWVYPN    | ITDPE     | ---- | YGYLAREYIYCLYWSTL  |  | 335  |      |      |      |  |
| CNGA2_Human         | TRTNYPNIFRISNLVLYILVIIIIHWNACIYFAISKFI  | IGFGVDTWVYPN    | ITDPE     | ---- | YGYLAREYIYCLYWSTL  |  | 333  |      |      |      |  |
| CNGA2_B.Taurus      | TRTSYPNIFRISNLVLYILVIIIIHWNACIYFAISKFI  | IGFGVDTWVYPN    | ITDPE     | ---- | YGYLSREYIYCLYWSTL  |  | 333  |      |      |      |  |
| CNGB1_Human         | SILSKAYVYRVIRTTAYLLYSLHLNCLYVWASAYQGLG  | STHWVYDGV       | -----     |      | GNSYIRCYVFAVK      |  | 841  |      |      |      |  |
| CNGB1_B.Taurus      | SILSKAYVYRVIRTTAYLLYSLHLNCLYVWASAYEGLG  | STHWVYDGV       | -----     |      | GNSYIRCYVFAVK      |  | 955  |      |      |      |  |
| CNGB1_Mouse         | SIMDKAYVYRVIRTTGYLLFLHLINACVYVWASDYEGIG | STKWVYNGE       | -----     |      | GNKYIRCFYFAVR      |  | 398  |      |      |      |  |
| CNGB3_Human         | SIMDKAYIYRVIRTTGYLLFLHLINACVYVWASNYEGIG | TTRWVYDGE       | -----     |      | GNEYIRCYVFAVR      |  | 403  |      |      |      |  |

H310 N312 Y316

Y347 Y349 W353 S354

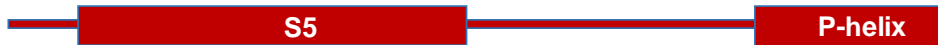

|                     | F380                                                    |  | D413                             |      |
|---------------------|---------------------------------------------------------|--|----------------------------------|------|
| CNGA1_B.Taurus      | TLTTIGETPPPVRDSEYFFVVDVFLIGVLIFATIVGNIGSMISNMNAARAEFQAR |  | IDAIKQYMHFRNVSKDMEK              | 430  |
| CNGA1_Mouse         | TLTTIGETPPPVLDSYEFVVDVFLIGVLIFATIVGNIGSMISNMNAARAEFQ    |  | SRVDAIKQYMNFRNVSKDMEK            | 424  |
| CNGA1_RAT           | TLTTIGETPPPVLDSYEFVVDVFLIGVLIFATIVGNIGSMISNMNAARAEFQ    |  | SRVDAIKQYMNFRNVSKDMEK            | 423  |
| CNGA1_Human         | TLTTIGETPPPVRDSEYFFVVDVFLIGVLIFATIVGNIGSMISNMNAARAEFQ   |  | ARIDAIKQYMHFRNVSKDMEK            | 501  |
| CNGA_X.Laevis       | TLTTIGETPPPVDSEYFFVVDVFLIGVLIFATIVGNVGSMSISNMNAARAEFQ   |  | GRIDAIKQYMHFRNVSKDLEK            | 435  |
| Tax-4_C.Elegans     | ILTTIGEVPSPVRNIEYAFVTLDMCGVLIFATIVGNVGSMSISNMNAARTE     |  | FQNKMDGIKQYMLERKQVSKQLEI         | 446  |
| CNGA_D.Melanogaster | TLTTIGETPTPENDVEYLFVVDVFLAGVLIFATIVGNIGSMISNMNVARVE     |  | FQNRMDGVKQYMAFRNVGHELEA          | 382  |
| CNGB_D.Melanogaster | TLTTIGETPTPENDVEYLFVVDVFLAGVLIFATIVGNIGSMISNMNVARVE     |  | FQNRMDGVKQYMAFRNVGHELEA          | 556  |
| CNGA4_Human         | ILTTVGDTPPPAREEYLFVVDVFLAVMGFATIMGSMSSVIYNNMTADAA       |  | FYPDHALVKKYMKLQHVNRKLER          | 301  |
| CNGA4_Rat           | ILTTVGDTPPLDREYLFVVDVFLAVMGFATIMGSMSSVIYNNMTADAA        |  | FYPDHALVKKYMKLQHVNRKLER          | 301  |
| CNGA3_Rat           | TLTTIGETPPPVKDEEYLFVVIDFLVGLVIFATIVGNVGSMSISNMNASRAE    |  | FQAKIDSIKQYMQFRKVTKDLET          | 356  |
| CNGA3_Mouse         | TLTTIGETPPPVKDEEYLFVVIDFLVGLVIFATIVGNVGSMSISNMNA        |  | PRVEFQAKIDSVKQYMQFRKVTKDLET      | 414  |
| CNGA3_B.Taurus      | TLTTIGETPPPVKDEEYLFVVIDFLVGLVIFATIVGNVGSMSISNMNASRAE    |  | FQAKIDSIKQYMQFRKVTKDLET          | 454  |
| CNGA3_Human         | TLTTIGETPPPVKDEEYLFVVIDFLVGLVIFATIVGNVGSMSISNMNASRAE    |  | FQAKIDSIKQYMQFRKVTKDLET          | 435  |
| CNGB1_D.Rerio       | TLTTIGEMPAFVQDEEYLFVVDVFLVGLVIFATIVGNVGSMSISNMNA        |  | TRAEFQQIDAIKHYMKFRKVSKELEA       | 410  |
| CNGA2_Mouse         | TLTTIGETPPPVKDEEYLFVIDFLVGLVIFATIVGNVGSMSISNMNA         |  | TRAEFQAKIDAVKHYMQFRKVSKDMEA      | 408  |
| CNGB1_Rat           | TLTTIGETPPPVKDEEYLFVIDFLVGLVIFATIVGNVGSMSISNMNA         |  | TRAEFQAKIDAVKHYMQFRKVSKDMEA      | 408  |
| CNGA2_Human         | TLTTIGETPPPVKDEEYLFVIDFLVGLVIFATIVGNVGSMSISNMNA         |  | TRAEFQAKIDAVKHYMQFRKVSKGMEA      | 406  |
| CNGA2_B.Taurus      | TLTTIGETPPPVKDEEYLFVIDFLVGLVIFATIVGNVGSMSISNMNA         |  | TRAEFQAKIDAVKHYMQFRKVSKEMEA      | 406  |
| CNGB1_Human         | TLITIGGLPDKTLFEIVFQGLNYFTGVFAFSVMIGQMRDVVGAATA          |  | GQTYYRSCMDSTVKYMNFKIPKSVQN       | 914  |
| CNGB1_B.Taurus      | TLITIGGLPDPRTLFEIVFQGLNYFTGVFAFSVMIGQMRDVVGAATA         |  | GQTYYRSCMDSTVKYMNFKIPKSVQN       | 1028 |
| CNGB1_Mouse         | TLITIGGLPEPQTSFEIVFQFLNFFSGVVFVSSSLIGQMRDVI             |  | GAATANQNYFQACMDHIIAYMNKYSIPQSVQY | 471  |
| CNGB3_Human         | TLITIGGLPEPQTLFEIVFQFLNFFSGVVFVSSSLIGQMRDVI             |  | GAATANQNYFRACMDTIIAYMNNYSIPKLVQK | 476  |

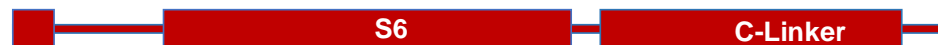

**Multiple Sequence Alignment of CNG channels.** Extended multiple alignment of 23 eukaryotic CNG channel sequences carried out using the multiple sequence alignment program MUSCLE<sup>1</sup>. Residues that are conserved in more than 70% of the eukaryotic sequences are highlighted in cyan. R297, F317, A322, I323, W330, V348, L351, L356, F380 and D413 residues are highlighted in violet. H310, N312, Y316, Y349, W353 and S354 (Figure 5C) are highlighted in green. The following groups of amino acid residues are considered similar: Asp/Glu, Lys/Arg, Phe/Tyr, Ser/Thr, Gly/Ala, Val/Leu/Ile/Met. The predicted secondary structure is shown at the bottom. This alignment is the basis for the web-logo analysis using an open source program available at <http://weblogo.berkeley.edu><sup>2</sup>.

## Supplementary Fig. 1

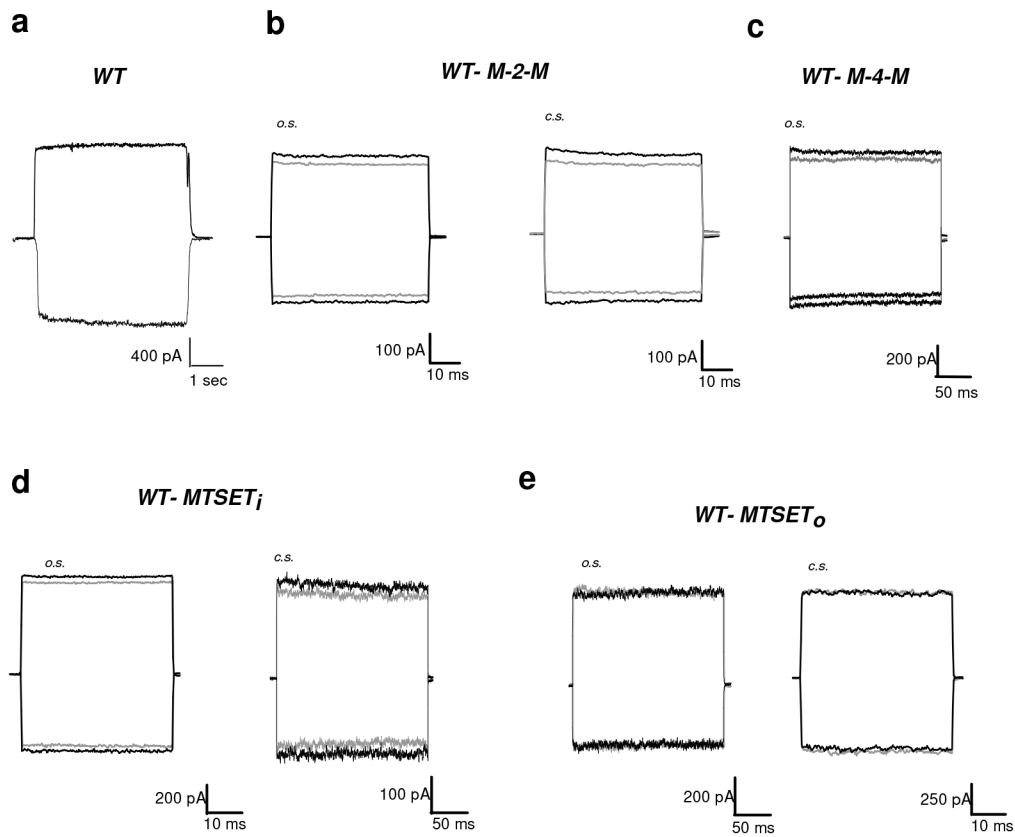

**The effect of sulphhydryl reagents on WT CNGA1 channels.** (a) Current recording evoked by 1 mM cGMP, during voltage steps at  $\pm 60$  mV in symmetrical  $\text{Na}^+$  solution for WT CNGA1. No current inactivation is observed with a marginal voltage dependent gating. (b) cGMP-activated currents at  $\pm 60$  mV for WT CNGA1 channels before (black lines) and after (grey lines) 2 minutes application of 100  $\mu\text{M}$  MTS-2-MTS in the open (o.s.) and closed (c.s.) state. (c) as in (B) but for 100  $\mu\text{M}$  MTS-4-MTS in the open state (o.s.). (d) as in (b) but for an application of 2.5 mM MTSET to the intracellular side (MTSET<sub>i</sub>). (e) the same as in (d) but with MTSET added to the extracellular side (MTSET<sub>o</sub>).

## Supplementary Fig.2

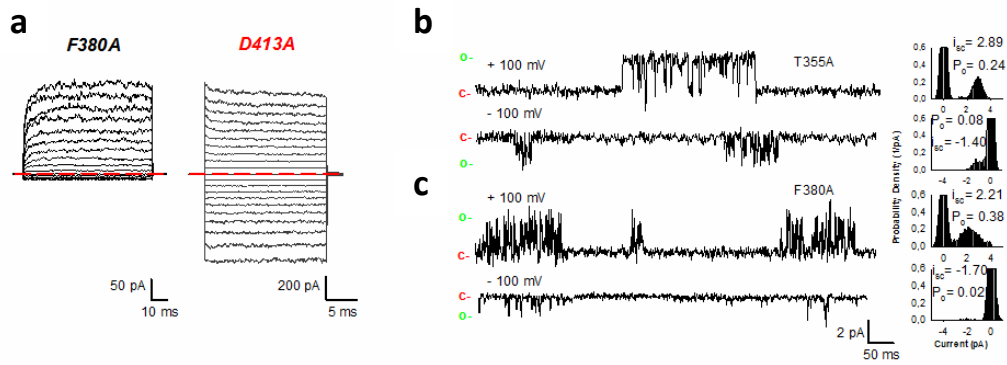

**Electrical properties of mutant channels following inactivation.** (a) Examples of macroscopic I/V relations obtained 2 minutes after the addition of 1 mM cGMP, i.e. after completion of inactivation, for the two types of mutant channels (F380A, left panel and D413A, right panel). Current recordings elicited by voltage steps from  $-200$  to  $+200$  mV ( $\Delta V = 20$  mV). (b-c) Single-channel recordings at  $+100$  and  $-100$  mV for mutant channels T355A (b) and F380A (c). Amplitude histograms from recordings in (b) and (c) are shown at the right (grey area). Solid black lines represent a two-components Gaussian fit to the histograms. The analysis of the amplitude histograms ( $n=3$ ) shows the amplitude of single channel currents is very similar at positive and negative voltages and that the open probability is about 2-10 times lower at negative than at positive voltages. Therefore the inactivation is caused by a time dependent decrease of the open probability (see also Bucossi et al.<sup>3</sup>).

Supplementary Fig.3

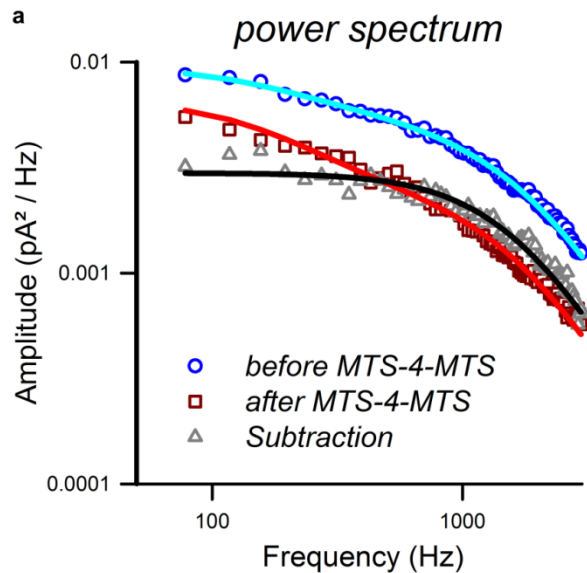

**Power spectrum of cGMP activated currents in the double mutant channels D413C\_R297C** - Power spectra of current fluctuations in the presence of 1 mM cGMP, before (empty blue circles) and after (empty brown squares) the application of 100  $\mu$ M MTS-4-MTS, at +40 mV. Subtracted power spectrum shown with grey empty triangles. Current recordings were filtered at 20 kHz and sampled at 60 kHz. Power spectra were computed as described by Sesti et al; 1994<sup>4</sup>. Power spectra for recordings obtained before and after the application of 100  $\mu$ M MTS-4-MTS were fitted with the sum of three Lorentzian functions with  $f_1$ ,  $f_2$  and  $f_3$  values of 177, 524 and 1600 Hz respectively and with  $S_1(0)$ ,  $S_2(0)$  and  $S_3(0)$  values of  $3.9 \times 10^{-3}$ ,  $5.2 \times 10^{-4}$  and  $5.1 \times 10^{-3}$  pA<sup>2</sup>/Hz and  $3.9 \times 10^{-3}$ ,  $5.2 \times 10^{-4}$  and  $2.1 \times 10^{-3}$  pA<sup>2</sup>/Hz for current recordings before and after the application of MTS-4-MTS respectively. Power spectrum for the subtraction curve was fitted with a single Lorentzian function with an  $f$  value of 1600 Hz and an  $S(0)$  value of  $3 \times 10^{-3}$  pA<sup>2</sup>/Hz. Analysis of the power spectrum of these fluctuations shows that the Lorentzian component with a cut-off frequency around 1600 Hz is reduced when the electrostatic interactions between D413 and R297 are replaced by a S-S bond between residues in the same locations.

## Supplementary Fig. 4

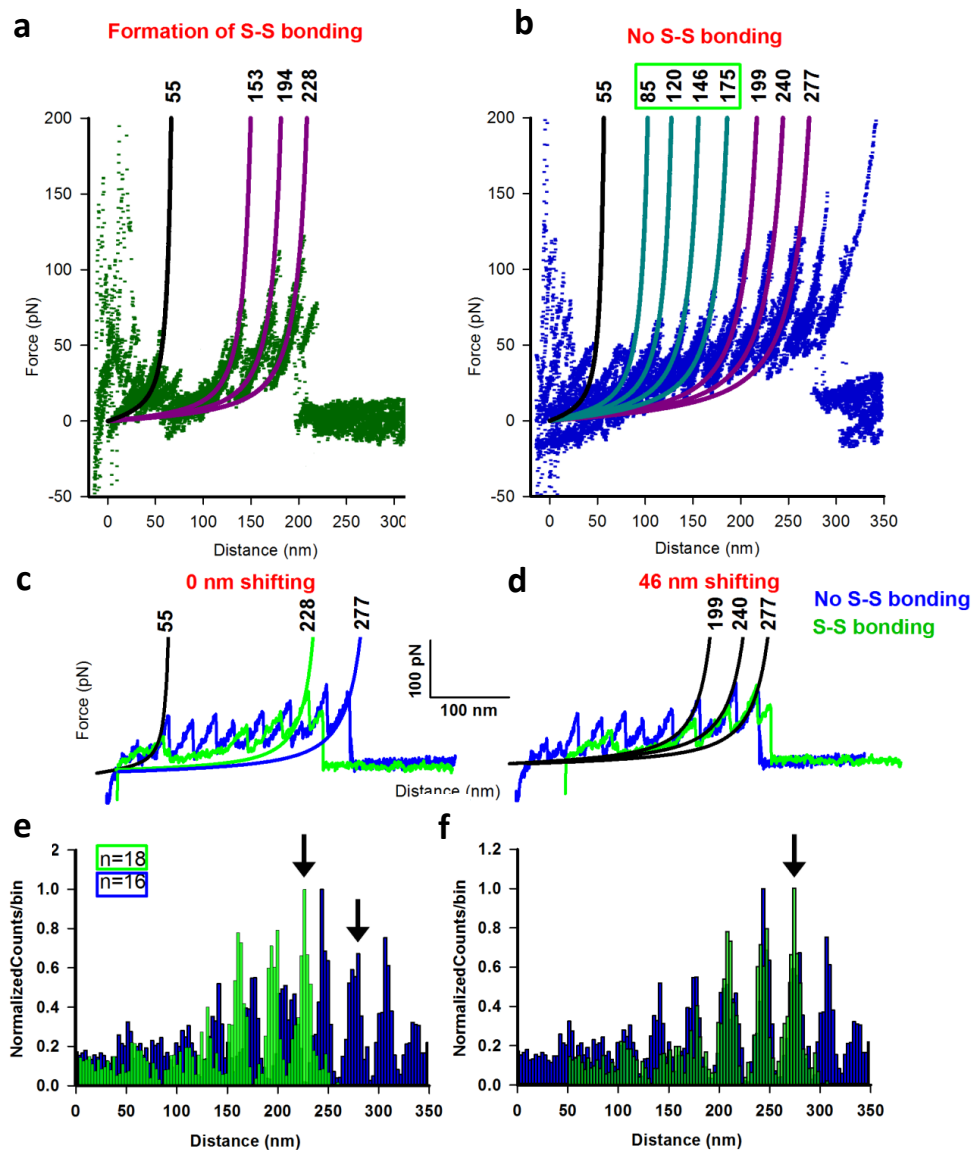

**SMFS experiments on double mutant channel D413C\_R297C.** (a) Unfolding of a single subunit of the double mutant channels with an unfolded length of about 228 nm, associated to the formation of an S-S bond between exogenous cysteines. Continuous lines represent the WLC fitting of the corresponding peaks, and the numbers are the corresponding values of  $L_c$ . Black lines are the fitting of the peaks that correspond to 55 nm, similar to what is observed in the CNGA1 at open state; violet lines are the fitting of the peaks representing the unfolding of the transmembrane domains S4-S3 and S2-S1 helices. (b) unfolding pattern of the mutant channel with an unfolded length  $>277$  nm (in  $L_c$ ), similar to the unfolding pattern that is observed in the WT CNGA1 channel in the open state, denoting the absence of the formation of an S-S bond between exogenous cysteines. Continuous lines represent the WLC fitting of the corresponding peaks and the numbers are the corresponding  $L_c$  values, in agreement to what is observed for CNGA1 channels in the open state. Cyan lines and corresponding numbers (in green box) represent the peaks that are missing during the unfolding of the mutant channel when a S-S bond is formed (A), violet lines represent the same peaks present in a, but shifted of 46 nm in  $L_c$ . (c-d) Comparison of single traces from panel a (green trace) and panel b (blue trace) with zero shifting, i.e. only the 55 nm peak is superimposed and with 46 nm shifting, i.e. the last three peaks at 199, 240, 277 nm are superimposed. (e-f) Cumulative  $L_c$  histogram obtained as in Maity et al., 2015<sup>5</sup>.

Supplementary Fig. 5

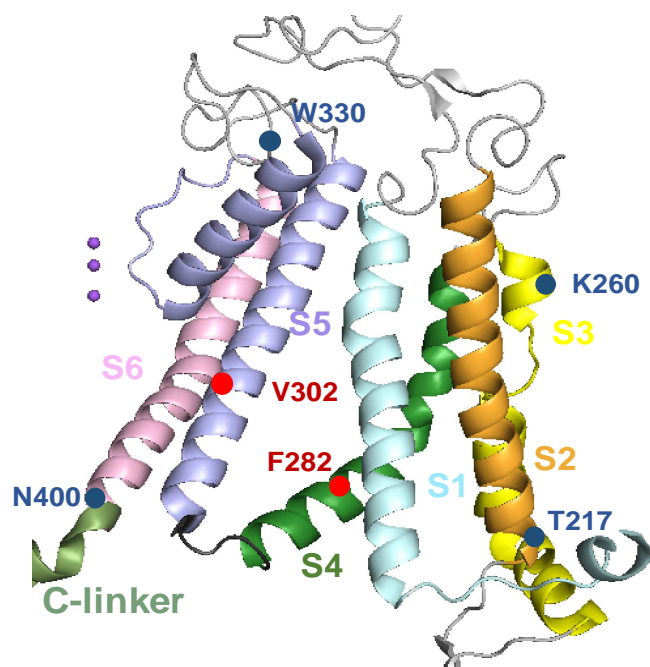

**Position of the residues shown in Figure 3A on the Tax-4 protomer structure.** We mapped the amino-acid residues shown in Figure 3A on the Tax-4 protomer structure (PDB ID: 5H3O). Different regions (S1-S6 and C-linker) are shown in different colors.

Supplementary Fig. 6

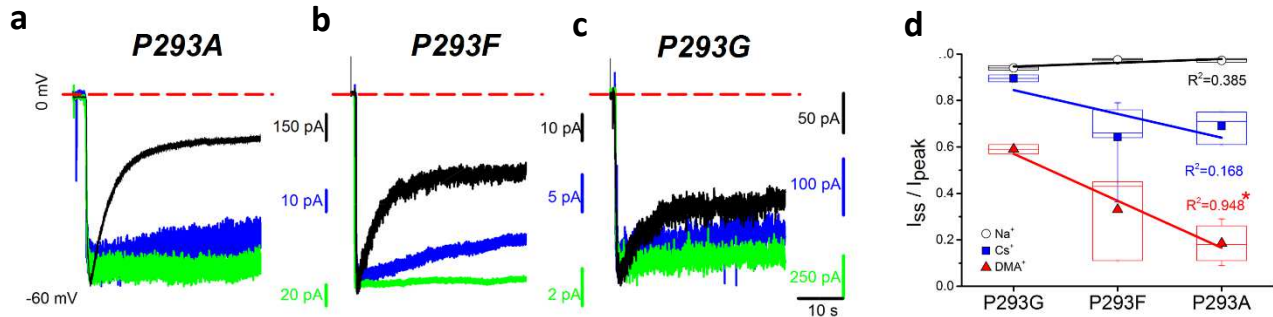

**Electrical recordings from P293 mutant channels.** (a,b,c) cGMP-activated currents for the mutant channels P293A, P293F and P293G respectively, in the presence of 1 mM cGMP at -60 mV and in the presence of different symmetrical ion solutions (Na<sup>+</sup>-green, Cs<sup>+</sup>-blue, DMA<sup>+</sup>-black). (d) box plot of the residual currents after inactivation versus the ion species for the three mutant channels. The horizontal line within each box indicates the median of the data; boxes show the twenty-fifth and seventy-fifth percentiles of the data; whiskers show the fifth and ninety-fifth percentiles of the data. Linear regression analysis indicates that the fractional steady state current ( $I_{ss}/I_{peak}$ ) correlate with the helical propensity of the amino acid being replaced to Proline in position 297. For the linear regression analysis the mean for each data set was used (symbols within each box plot). Mutant channels were ordered on the x-axis according to their helix-propensity energy profiles (ref. 6; glycine > phenylalanine > alanine). (\*) indicates a statistical significance with  $P < 0.05$ .



Supplementary Fig. 7

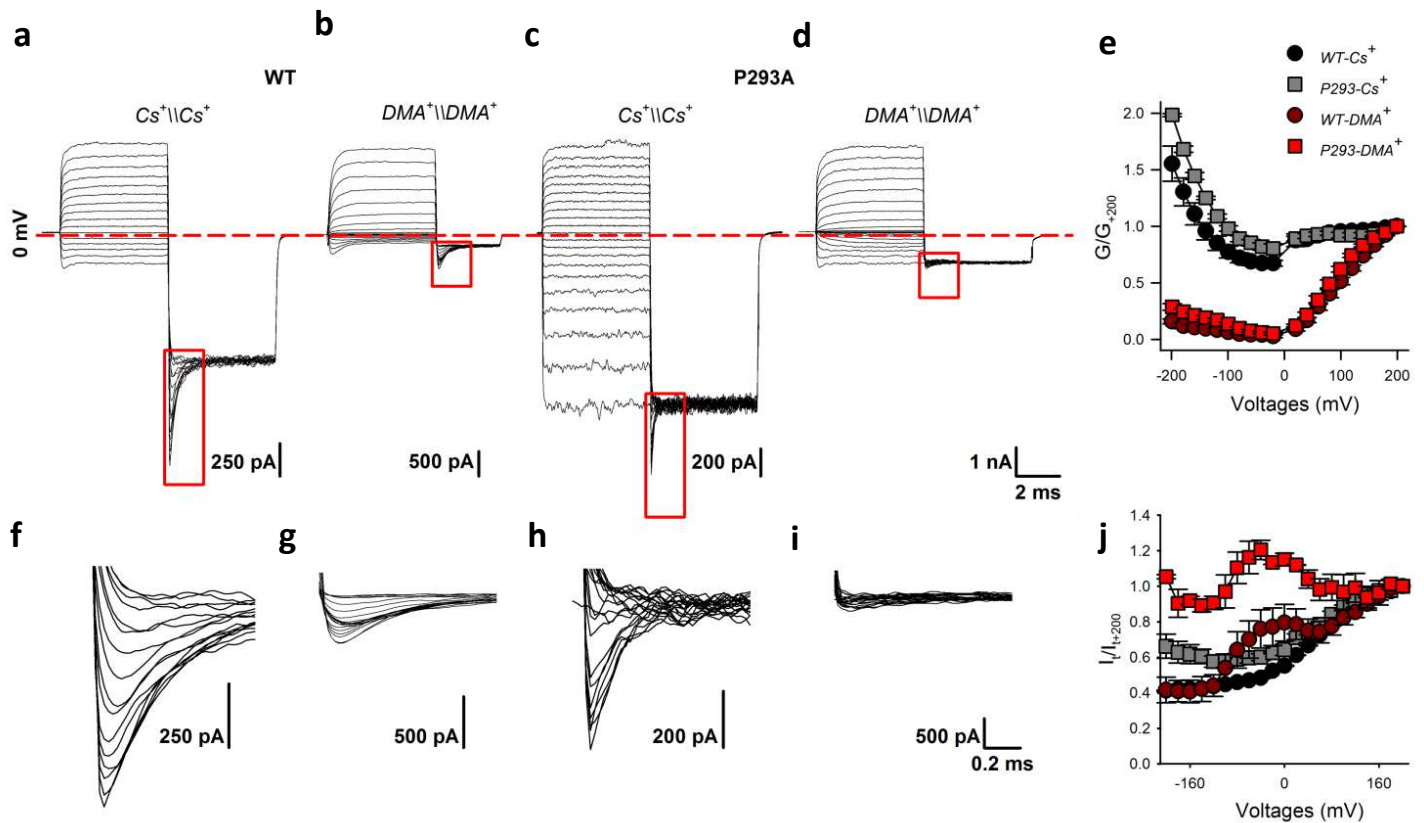

**Comparison of electrical properties of WT and P293A mutant channels.** (a-d) Macroscopic currents recorded from excised patches in symmetrical solutions of Cs<sup>+</sup> (a,c) and DMA<sup>+</sup> (b,d) for WT (a,b) and P293A (c,d) mutant channels with 1 mM cGMP in the intracellular medium. Leak and capacitive components were removed subtracting from the cGMP-activated current those recordings obtained in response to the same voltage protocol, but without cGMP. The voltage commands were stepped from a holding potential of 0 mV to prepulses varying between -100 and +200 mV in 20 mV steps. At the end, the voltage command was moved to -200 mV for 5 msec in order to elicit tail currents  $I_t$  (V). Red broken line indicates 0 current level. (f-i) Enlargement of tail currents (boxed areas in A-D). Current recordings were filtered at 10 kHz and sampled at 50 kHz to resolve rapid transients. (e) Dependence of  $G/G_{+200}$  on V in symmetrical solutions of Cs<sup>+</sup> (black and grey) and DMA<sup>+</sup> (red and dark red) for WT (circles) and P293A (squares) mutant channels. (j) Estimation of  $P_o/P_{o\_max}$  from tail currents.  $P_o/P_{o\_max}$  was estimated as  $I_t/I_{t+200}$ ; symbols and colors are the same as in (e).



### One-way ANOVA (Open state), referred to Figure 4I

|                    |        |
|--------------------|--------|
| DoF                | 13,45  |
| F                  | 6,783  |
| P                  | <0.001 |
| Stat. Significance | ***    |

### Pairwise Comparisons vs WT (Holm-Sidak)

| Mutant             | R297C | I298C | S299C | N300C | L301C | V302C | M303C |
|--------------------|-------|-------|-------|-------|-------|-------|-------|
| n                  | 4     | 4     | 3     | 4     | 8     | 3     | 3     |
| P                  | 0,884 | 0,866 | 0,903 | 0,906 | 0,98  | 0,46  | 0,863 |
| Stat. Significance | ns    | ns    | ns    | ns    | ns    | ns    | ns    |

| Mutant             | Y304C  | I305C | I306C | I308C | V320C | M323C |
|--------------------|--------|-------|-------|-------|-------|-------|
| n                  | 7      | 4     | 6     | 3     | 3     | 3     |
| P                  | <0.001 | 0,88  | 0,945 | 0,403 | 0,907 | 0,811 |
| Stat. Significance | ***    | ns    | ns    | ns    | ns    | ns    |

### One-way ANOVA (Closed state), referred to Figure 4I

|                    |        |
|--------------------|--------|
| DoF                | 13,46  |
| F                  | 8,181  |
| P                  | <0.001 |
| Stat. Significance | ***    |

### Pairwise Comparisons vs WT (Holm-Sidak)

| Mutant             | R297C  | I298C | S299C | N300C | L301C | V302C | M303C |
|--------------------|--------|-------|-------|-------|-------|-------|-------|
| n                  | 5      | 5     | 3     | 5     | 8     | 3     | 3     |
| P                  | <0,001 | 0,624 | 0,162 | 0,802 | 0,307 | 0,75  | 0,409 |
| Stat. Significance | ***    | ns    | ns    | ns    | ns    | ns    | ns    |

| Mutant             | Y304C | I305C | I306C | I308C | V320C | M323C |
|--------------------|-------|-------|-------|-------|-------|-------|
| n                  | 3     | 3     | 6     | 4     | 4     | 3     |
| P                  | 0,791 | 0,785 | 0,765 | 0,174 | 0,842 | 0,404 |
| Stat. Significance | ns    | ns    | ns    | ns    | ns    | ns    |

**d**

| Unpaired two-tail T-test (Open vs Closed) referred to Figure 4J |       |                     |        |       |        |        |
|-----------------------------------------------------------------|-------|---------------------|--------|-------|--------|--------|
| Mutant                                                          | WT    | A322C               | I323C  | N327C | V348C  | L351C  |
| n                                                               | 3;3   | 7;3                 | 4;5    | 3;3   | 7;7    | 4;4    |
| DoF                                                             | 4     | 8                   | 7      | 4     | 12     | 6      |
| t                                                               | 0,538 | -3,668 <sup>^</sup> | -0,399 | -0,72 | -4,544 | -3,109 |
| P                                                               | 0,619 | 0,00633             | 0,702  | 0,511 | <0.001 | 0,0209 |
| Stat. Significance                                              | n.s.  | **                  | n.s.   | n.s.  | ***    | *      |

#### One-way ANOVA (Open state), referred to Figure 4J

|                    |        |
|--------------------|--------|
| DoF                | 5,22   |
| F                  | 23,688 |
| P                  | <0.001 |
| Stat. Significance | ***    |

#### Pairwise Comparisons vs WT (Holm-Sidak)

| Mutant             | A322C | I323C | N327C | V348C | L351C |
|--------------------|-------|-------|-------|-------|-------|
| n                  | 7     | 4     | 3     | 7     | 4     |
| P                  | 0,01  | <0.01 | 0,79  | <0.01 | 0,945 |
| Stat. Significance | *     | **    | n.s.  | **    | n.s.  |

#### One-way ANOVA (Closed state), referred to Figure 4J

|                    |        |
|--------------------|--------|
| DoF                | 5,19   |
| F                  | 41,462 |
| P                  | <0.001 |
| Stat. Significance | ***    |

#### Pairwise Comparisons vs WT (Holm-Sidak)

| Mutant             | A322C | I323C  | N327C | V348C  | L351C |
|--------------------|-------|--------|-------|--------|-------|
| n                  | 3     | 5      | 3     | 7      | 4     |
| P                  | 0,41  | <0.001 | 0,57  | <0.001 | <0.01 |
| Stat. Significance | n.s.  | ***    | n.s.  | ***    | **    |

e

| Unpaired two-tail T-test (Open vs Closed) referred to Figure 6D |                     |        |                    |        |        |                     |                    |        |
|-----------------------------------------------------------------|---------------------|--------|--------------------|--------|--------|---------------------|--------------------|--------|
| Mutant                                                          | F375C               | V376C  | V377C              | A378C  | D379C  | F380C               | I382C              | G383C  |
| n                                                               | 3;3                 | 3;3    | 3;4                | 3;3    | 3;3    | 6;6                 | 3;3                | 6;4    |
| DoF                                                             | 4                   | 4      | 5                  | 4      | 4      | 10                  | 4                  | 8      |
| t                                                               | -0,114              | -0,378 | -9,371             | -7,632 | 0,981  | -7,407              | 6,877              | -2,278 |
| P                                                               | 0,915 <sup>^</sup>  | 0,725  | <0,001             | <0,01  | 0,382  | <0,001 <sup>†</sup> | <0,01 <sup>†</sup> | 0,052  |
| Stat. Significance                                              | n.s.                | n.s.   | ***                | **     | n.s.   | ***                 | **                 | n.s.   |
| Mutant                                                          | L385C               | I386C  | I390C              | V391C  | G392C  | S399C               | N402C              | A406C  |
| n                                                               | 4;5                 | 4;4    | 6;2                | 3;3    | 5;5    | 6;8                 | 3;3                | 4;4    |
| DoF                                                             | 7                   | 6      | 6                  | 4      | 8      | 11                  | 4                  | 6      |
| t                                                               | 11,569              | -3,45  | -0,465             | 25,158 | 2,228  | -2,147              | -27,762            | 2,438  |
| P                                                               | <0,001 <sup>†</sup> | 0,0136 | 0,658 <sup>^</sup> | <0,001 | 0,0565 | 0,0549              | <0,001             | 0,0506 |
| Stat. Significance                                              | ***                 | *      | ns                 | ***    | ns     | ns                  | ***                | ns     |
| Mutant                                                          | Q409C               | D413C  | A414C              | D416C  | Q417C  | H420C               |                    |        |
| n                                                               | 5;5                 | 4;4    | 3;4                | 4;4    | 4;4    | 3;3                 |                    |        |
| DoF                                                             | 8                   | 6      | 5                  | 6      | 6      | 4                   |                    |        |
| t                                                               | -9,907              | 6,212  | 0,761              | 4,775  | 5,945  | -2,689              |                    |        |
| P                                                               | <0,001              | <0,001 | 0,481              | <0,01  | <0,01  | 0,0547              |                    |        |
| Stat. Significance                                              | ***                 | ***    | ns                 | **     | **     | ns                  |                    |        |

| One-way ANOVA (Open state), referred to Figure 6D |        |
|---------------------------------------------------|--------|
| DoF                                               | 22,68  |
| F                                                 | 14,029 |
| P                                                 | <0.001 |
| Stat. Significance                                | ***    |

| Pairwise Comparisons vs WT (Holm-Sidak) |       |       |       |       |       |        |       |       |
|-----------------------------------------|-------|-------|-------|-------|-------|--------|-------|-------|
| Mutant                                  | F375C | V376C | V377C | A378C | D379C | F380C  | I382C | G383C |
| n                                       | 3     | 3     | 3     | 3     | 3     | 6      | 3     | 6     |
| P                                       | 0,544 | 0,561 | 0,062 | 0,014 | 0,507 | <0,001 | 0,357 | 0,047 |
| Stat. Significance                      | ns    | ns    | ns    | *     | ns    | ***    | ns    | *     |

| Mutant             | L385C | I386C | I390C  | V391C  | G392C | S399C | N402C | A406C |
|--------------------|-------|-------|--------|--------|-------|-------|-------|-------|
| n                  | 4     | 4     | 6      | 3      | 5     | 6     | 3     | 4     |
| P                  | 0,56  | 0,584 | <0,001 | <0,001 | 0,398 | 0,148 | 0,543 | 0,622 |
| Stat. Significance | ns    | ns    | ***    | ***    | ns    | ns    | ns    | ns    |

  

| Mutant             | Q409C | D413C  | A414C | D416C | Q417C | H420C |
|--------------------|-------|--------|-------|-------|-------|-------|
| n                  | 5     | 4      | 3     | 4     | 4     | 3     |
| P                  | 0,292 | <0,001 | 0,473 | 0,64  | 0,554 | 0,604 |
| Stat. Significance | ns    | ***    | ns    | ns    | ns    | ns    |

### One-way ANOVA (Closed state), referred to Figure 6D

|                    |        |
|--------------------|--------|
| DoF                | 22,69  |
| F                  | 16,986 |
| P                  | <0,001 |
| Stat. Significance | ***    |

### Pairwise Comparisons vs WT (Holm-Sidak)

| Mutant             | F375C | V376C | V377C | A378C | D379C | F380C | I382C  | G383C |
|--------------------|-------|-------|-------|-------|-------|-------|--------|-------|
| n                  | 3     | 3     | 4     | 3     | 3     | 6     | 3      | 4     |
| P                  | 0,848 | 0,824 | 0,873 | 0,835 | 0,697 | 0,717 | <0,001 | 0,728 |
| Stat. Significance | ns    | ns    | ns    | ns    | ns    | ns    | ***    | ns    |

  

| Mutant             | L385C  | I386C | I390C | V391C | G392C | S399C | N402C | A406C |
|--------------------|--------|-------|-------|-------|-------|-------|-------|-------|
| n                  | 5      | 4     | 2     | 3     | 5     | 8     | 3     | 4     |
| P                  | <0,001 | 0,988 | 0,081 | 0,714 | 0,883 | 0,561 | 0,989 | 0,826 |
| Stat. Significance | ***    | ns    | ns    | ns    | ns    | ns    | ns    | ns    |

  

| Mutant             | Q409C  | D413C  | A414C | D416C | Q417C | H420C |
|--------------------|--------|--------|-------|-------|-------|-------|
| n                  | 5      | 4      | 4     | 4     | 4     | 3     |
| P                  | <0,001 | <0,001 | 0,956 | 0,735 | 0,4   | 0,904 |
| Stat. Significance | ***    | ***    | ns    | ns    | ns    | ns    |

f

### Unpaired two-tail T-test (Open vs Closed) referred to Figure 7C

| Mutant             | Q409C | A414C  | Q417C               | WT                  |
|--------------------|-------|--------|---------------------|---------------------|
| n                  | 3;5   | 6;5    | 2;2                 | 2;2                 |
| DoF                | 9     | 2      | 2                   | 6                   |
| t                  | 0,33  | -0,736 | -6,57               | -2,724              |
| P                  | 0,749 | 0,539  | 0,0224 <sup>†</sup> | 0,0345 <sup>†</sup> |
| Stat. Significance | ns    | ns     | *                   | *                   |

### One-way ANOVA (Open state), referred to Figure 7C

|                    |         |
|--------------------|---------|
| DoF                | 3,9     |
| F                  | 108,831 |
| P                  | <0,001  |
| Stat. Significance | ***     |

### Pairwise Comparisons vs WT (Holm-Sidak)

| Mutant             | Q409C  | A414C | Q417C |
|--------------------|--------|-------|-------|
| n                  | 6      | 2     | 2     |
| P                  | <0,001 | 0,894 | 0,695 |
| Stat. Significance | ***    | ns    | ns    |

### One-way ANOVA (Closed state), referred to Figure 7C

|                    |        |
|--------------------|--------|
| DoF                | 5,17   |
| F                  | 13,753 |
| P                  | <0,001 |
| Stat. Significance | ***    |

### Pairwise Comparisons vs WT (Holm-Sidak)

| Mutant             | A406  | Q409C  | A414C | Q417C |
|--------------------|-------|--------|-------|-------|
| n                  | 5     | 5      | 2     | 2     |
| P                  | 0,396 | <0,001 | 0,623 | 0,044 |
| Stat. Significance | ns    | ***    | ns    | *     |

**Statistical analysis.** Tables (a), (b), (c), (d), (e) and (f) refer to the results from the indicated statistical tests performed on data presented in Fig. 1d, 1e, 4i, 4j, 6d and 7b of the main text, respectively. Statistical significance of voltage-dependent inactivation versus non voltage-dependent inactivation was established using unpaired two-tailed t-test (a,b). Statistical significance of the MTSET/M2M state-dependent effect (MTSET/M2M applied in the presence versus absence of cGMP) for each mutant channel was assessed using unpaired two-tailed t-test (c-f). Statistical significance of the MTSET effect (blockage or potentiation) among all mutant channels was established by single-variable ANOVA. For pairwise comparisons with WT (control), a Holm–Sidak test was used as *post hoc* test (c-f). F indicates the F-value obtained from one-way ANOVA. t indicates the t-value obtained from t-test. DoF refers to degree of freedom. n indicates the number of patches. (^) indicates a  $P < 0,05$  in Normality test (Shapiro-Wilk). (†) indicates a  $P < 0,05$  in Equal variance test. n.s. indicates a not statistically significant P value. (\*)  $P < 0,05$ ; (\*\*)  $P < 0,01$ ; (\*\*\*)  $P < 0,001$ .



## Supplementary Fig. 8

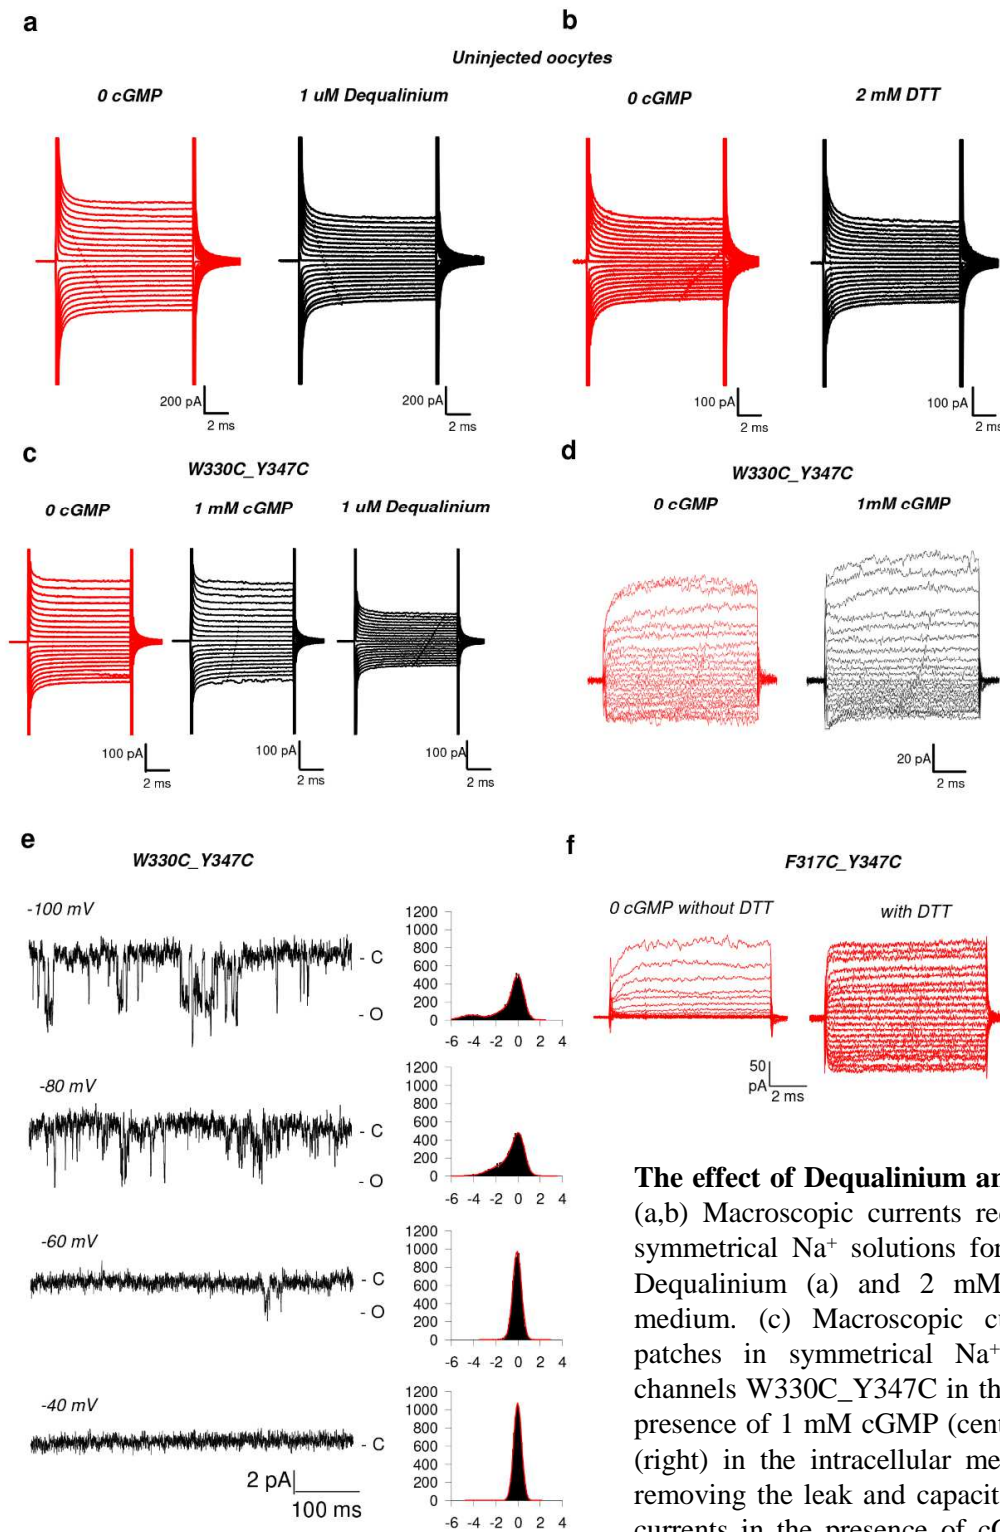

### The effect of Dequalinium and DTT on membrane patches.

(a,b) Macroscopic currents recorded from excised patches in symmetrical  $\text{Na}^+$  solutions for uninjected oocytes with  $1 \mu\text{M}$  Dequalinium (a) and  $2 \text{mM}$  DTT (b) in the intracellular medium. (c) Macroscopic currents recorded from excised patches in symmetrical  $\text{Na}^+$  solutions for double mutant channels W330C\_Y347C in the absence of cGMP (left), in the presence of  $1 \text{mM}$  cGMP (center) and with  $1 \mu\text{M}$  Dequalinium (right) in the intracellular medium. (d) The same as (c) but removing the leak and capacitive components by subtracting currents in the presence of cGMP to currents without cGMP those obtained in response to the same voltage protocol but in the presence of  $1 \mu\text{M}$  Dequalinium. In panel a, b, c and d current recordings were elicited by voltage steps from  $-200$  to  $+200 \text{mV}$  ( $\Delta V = 20 \text{mV}$ ). (e) single channels recordings obtained in the absence of cGMP for mutant channels W330C\_Y347C, elicited by different voltages. Amplitude histograms are shown at the right of each trace.  $I_{cs}$  indicates the estimated single-channel current amplitude. (f) In panel left current recordings obtained in the absence of cGMP ( $0 \text{cGMP}$ ) for mutant channels F317C\_Y347C, elicited by voltage steps from  $-200$  to  $+200 \text{mV}$  ( $\Delta V = 20 \text{mV}$ ); in panel right the same but after 5 minute of the addition of  $2 \text{mM}$  DTT.

## Supplementary Fig. 9

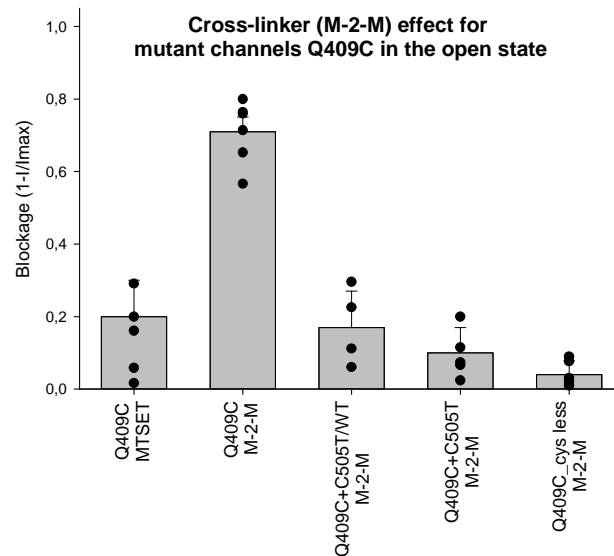

### **The effect of the cross-linker M-2-M on mutant channel Q409C in the open state.**

Blockage by MTSET in the open state on mutant channels Q409C (n=6), blockage by M-2-M of mutant channels Q409C\_C505T (n=5), of mutant channels Q409C\_C505T/WT tandem (n=4) and Q409C in the cysless CNGA1 background (n=5). M-2-M blockage was abolished in the double mutant Q409C + C505T and in the tandem construct Q409C + C505T/WT as well as in mutant channels Q409C in in CNGA1 channels without endogenous cysteines<sup>7,8</sup>.

In order to identify the molecular mechanisms underlying the open state inhibition, we analyzed the effect of 100  $\mu$ M M-2-M on mutant channels Q409C when C505 was replaced with a threonine and in this case M-2-M did not inhibit the double mutant channels Q409C + C505T. Therefore, inhibition of Q409C in the open state caused by M-2-M is due to its cross-linking to 409C and C505. In order to establish whether the inhibition was a consequence of the cross-linkage between two cysteines from the same subunit or from neighboring subunits, M-2-M inhibition in the open state was analyzed in the tandem Q409C + C505T/WT. In this tandem construct, each subunit contained either 409C or C505 and the cross-linkage between 409C and the C505 can occur only between different subunits. M-2-M in the open state did not inhibit the tandem construct Q409C + C505T/WT and it is concluded that inhibition of mutant channels Q409C by M-2-M in the open state is caused by the cross-linkage of C505 with 409C of the same subunit.

## References

1. Sievers, F. et al. (2014) Fast, scalable generation of high-quality protein multiple sequence alignments using Clustal Omega. *Molecular Systems Biology* 7, 539–539.
2. Crooks, G.E., Hon, G., Chandonia, J.-M. and Brenner, S.E. (2004) WebLogo: a sequence logo generator. *Genome Res.* 14, 1188–1190.
3. Bucossi, G., Eismann, E., Sesti, F., Nizzari, M., Seri, M., Kaupp, U.B., and Torre, V. (1996) Time-dependent current decline in cyclic GMP-gated bovine channels caused by point mutations in the pore region expressed in *Xenopus* oocytes. *J Physiol.* 493, 409-18.
4. Sesti, F., Straforini, M., Lamb, T.D. and Torre, V. (1994) Gating, selectivity and blockage of single channels activated by cyclic GMP in retinal rods of the tiger salamander. *The Journal of Physiology* 474, 203.
5. Maity, S. et al. (2015) Conformational rearrangements in the transmembrane domain of CNGA1 channels revealed by single-molecule force spectroscopy. *Nat Commun* 6, 7093.
6. Pace, C.N. and Scholtz, J.M. (1998) A helix propensity scale based on experimental studies of peptides and proteins. *Biophys. J.* 75, 422–427.
7. Nair, A.V., Anselmi, C., and Mazzolini, M. (2009) Movements of native C505 during channel gating in CNGA1 channels. *Eur Biophys J.* 38, 465-78.
8. Nair, A.V., Nguyen, C.H., and Mazzolini M. (2009) Conformational rearrangements in the S6 domain and C-linker during gating in CNGA1 channels. *Eur Biophys J.* 38, 993-1002.
